# Supplementary material
Source: PubMed Central journal article supplement (PMC7116728)
Supplement: EMS114556-supplement-Supplementary_figure.pdf [file EMS114556-supplement-Supplementary_figure.pdf]

---

**Supplementary information**

---

**Structural transitions in influenza  
haemagglutinin at membrane fusion pH**

---

In the format provided by the  
authors and unedited

Donald J. Benton , Steven J. Gamblin, Peter B. Rosenthal  & John J. Skehel

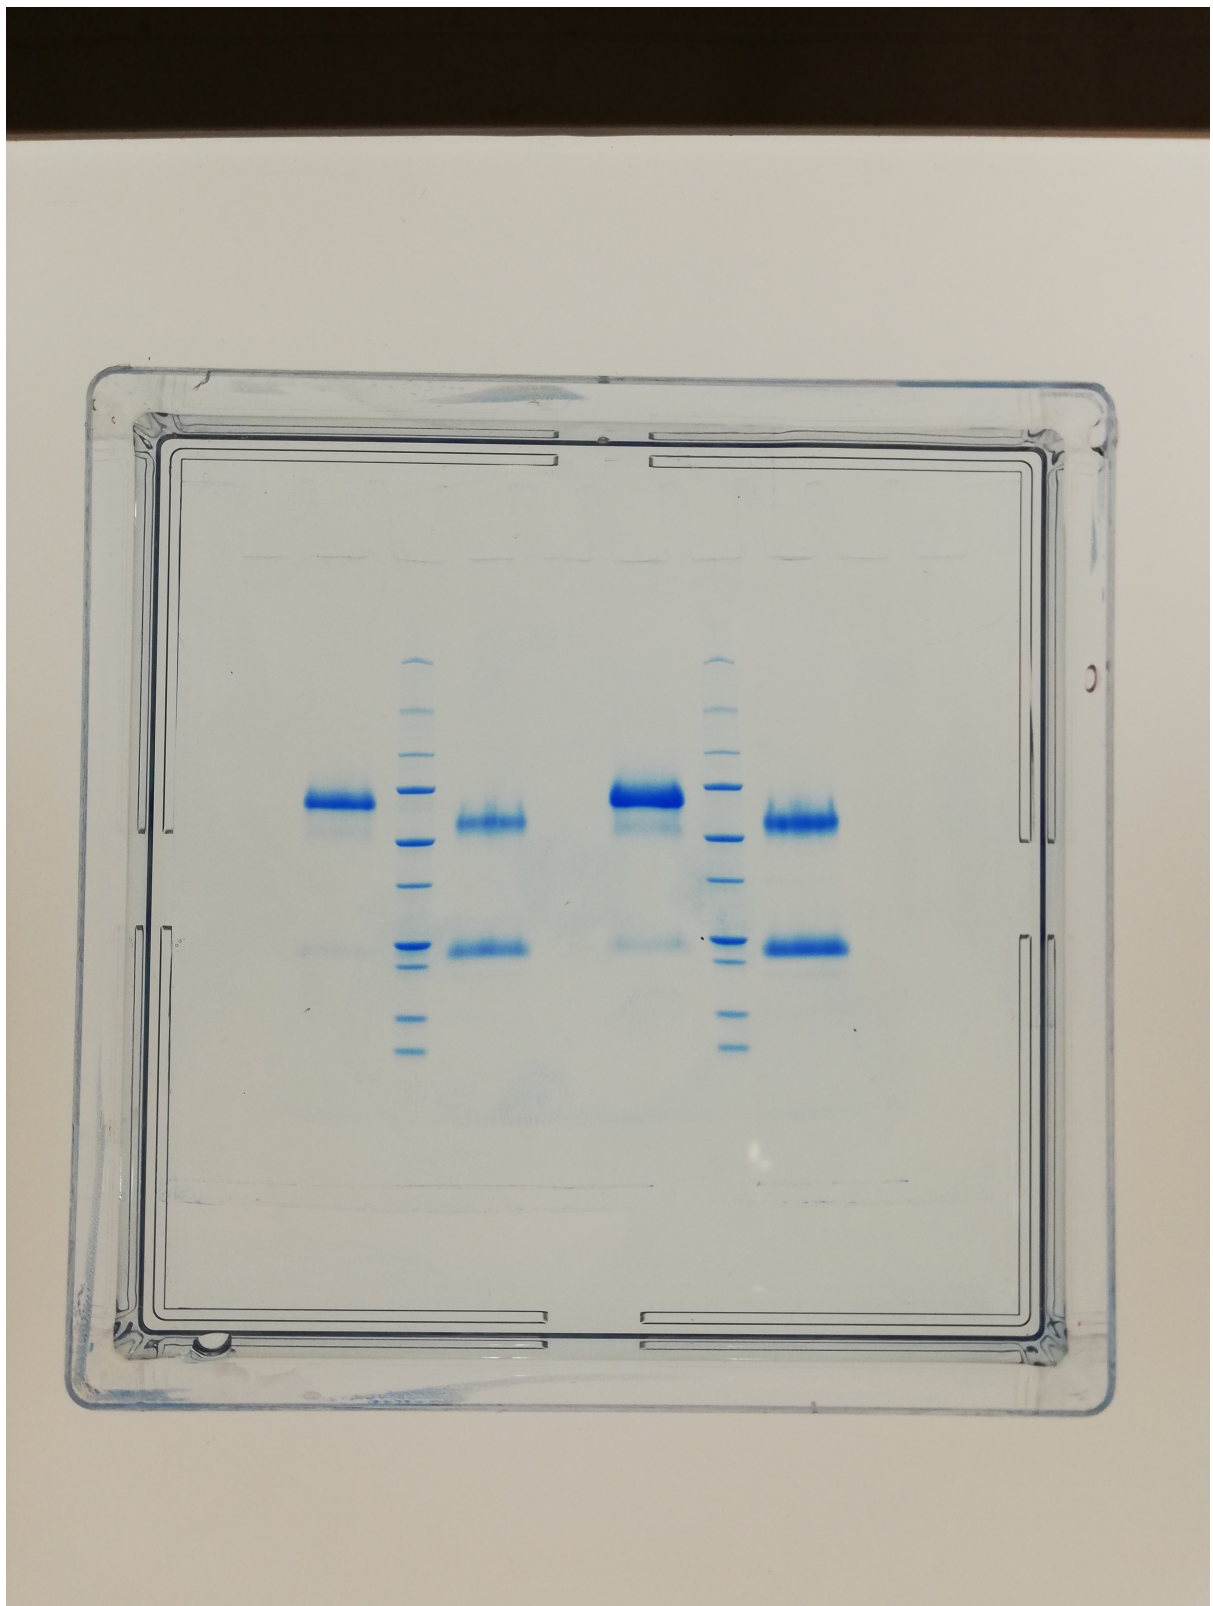

**Supplementary Figure 1:** Raw Image of SDS-PAGE gel in Extended Data Figure 6C
